# Supplementary material for: Discovery of very active catalysts for methanol carboxylation into DMC by screening of a large and diverse catalyst library
Source: Royal Society of Chemistry journal article supplement (doi:10.1039/c9nj06067g), 2020-01-01
Supplement: c9nj06067g1.pdf [file c9nj06067g1.pdf]

## Supplementary data

**Table 1S. Final pressure reached after 1 h of reaction, versus different introduction times of liquid CO<sub>2</sub>**

| CO <sub>2</sub> introduction time in 12 g of MeOH / mn | Liquid CO <sub>2</sub> flow rate / ml.min <sup>-1</sup> | Final pressure in reactor heated at 413K /bar |
|--------------------------------------------------------|---------------------------------------------------------|-----------------------------------------------|
| 3.6                                                    | 5                                                       | 120                                           |
| 6                                                      | 3                                                       | 140                                           |

**Table 2S. Water mass balance during a catalytic test with 0.5 g of catalyst, 12 g of MeOH and 0.375 mol CO<sub>2</sub>**

| Water source                 | Initial H <sub>2</sub> O in CH <sub>3</sub> OH | Initial H <sub>2</sub> O in CO <sub>2</sub>           | Initial H <sub>2</sub> O in catalyst         | H <sub>2</sub> O produced by reaction                |
|------------------------------|------------------------------------------------|-------------------------------------------------------|----------------------------------------------|------------------------------------------------------|
| Hypothesis                   | 0.375 mol MeOH with 300 ppm H <sub>2</sub> O   | 0.375 mol CO <sub>2</sub> with 5 ppm H <sub>2</sub> O | 500 mg wet catalyst 15 wt.% H <sub>2</sub> O | Final conversion is assumed to be 0.7% based on MeOH |
| H <sub>2</sub> O mass (g)    | 0.002                                          | <10 <sup>-3</sup> g                                   | 0.075                                        | 0.0236                                               |
| H <sub>2</sub> O balance (g) | <b>H<sub>2</sub>O Initial mass : 0.077</b>     |                                                       |                                              | <b>H<sub>2</sub>O produced : 0.0236</b>              |

**Table 3S. Activities of pure oxides from literature in direct synthesis of DMC**

| Results from literature: Activity / μmol.g <sup>-1</sup> .s <sup>-1</sup> |                                                 |                         |
|---------------------------------------------------------------------------|-------------------------------------------------|-------------------------|
| Oxide                                                                     | Activity/ μmol.g <sup>-1</sup> .s <sup>-1</sup> | Reference / Comment     |
| La <sub>2</sub> O <sub>3</sub>                                            | 0                                               | [32]                    |
| Ce <sub>2</sub> O <sub>3</sub>                                            | 0                                               | [32]                    |
| SiO <sub>2</sub>                                                          | 0                                               | [25]                    |
| Al <sub>2</sub> O <sub>3</sub>                                            | 0                                               | [25] Selectivity to DME |
| TiO <sub>2</sub>                                                          | 0                                               | [25] Selectivity to DME |
| ZnO                                                                       | 0                                               | [25]                    |
| MoO <sub>3</sub>                                                          | 0                                               | [25]                    |
| Bi <sub>2</sub> O <sub>3</sub>                                            | 0                                               | [25]                    |

**Fig. 15. Activities of various cerias versus specific surface area in direct synthesis of DMC**

| Entry | Ceria sample                                                |
|-------|-------------------------------------------------------------|
| A     | Ceria 1 supplied by Johnson Matthey                         |
| B     | Ceria 2 supplied by Johnson Matthey                         |
| C     | Ceria 3 flame sprayed supplied by Johnson Matthey           |
| D     | Ceria precipitated                                          |
| E     | Ceria HSA Solvay                                            |
| F     | CeO <sub>2</sub> Aldrich nanopowder (25 nm < particle size) |
| G     | CeO <sub>2</sub> Aldrich micro                              |
| H     | CeO <sub>2</sub> fused (3-6 mm)                             |

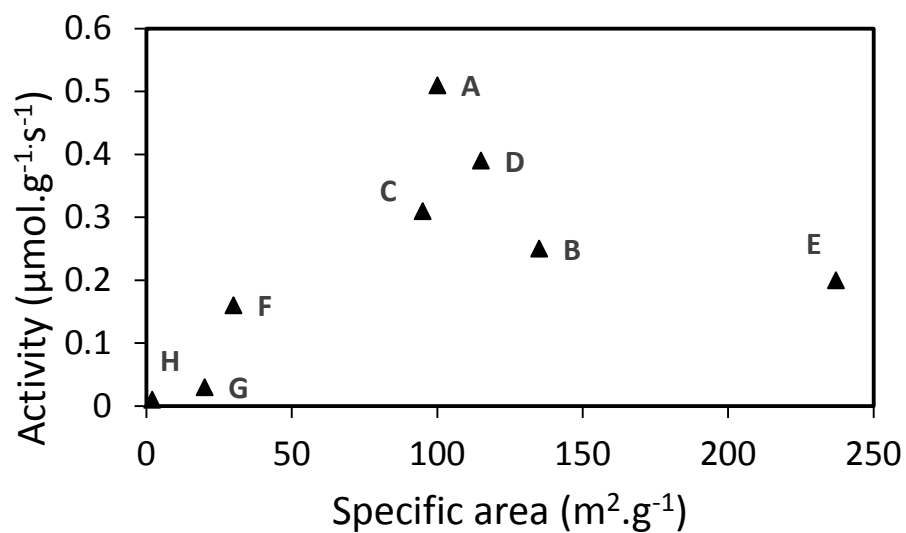

**Table 4S. Impregnated cerias**

| Reference<br>(% weight)     | Thermal treatment<br>temperature<br>K | Specific surface<br>area<br>$\text{m}^2.\text{g}^{-1}$ | Activity<br>$\mu\text{mol}.\text{g}^{-1}.\text{s}^{-1}$ |
|-----------------------------|---------------------------------------|--------------------------------------------------------|---------------------------------------------------------|
| P-CeO <sub>2</sub>          | 773                                   | 115                                                    | 0.39                                                    |
| 1% Al/CeO <sub>2</sub>      | 773                                   | 82                                                     | 0.03                                                    |
| 1% Al/CeO <sub>2</sub> -750 | 1023                                  | 57                                                     | 0.10                                                    |
| 1% Zn/CeO <sub>2</sub>      | 773                                   | 92                                                     | 0.50                                                    |
| 1% Fe/CeO <sub>2</sub>      | 773                                   | 89                                                     | 0.39                                                    |
| 1% La/CeO <sub>2</sub>      | 773                                   | 85                                                     | 0.68                                                    |
| 5% La/CeO <sub>2</sub>      | 773                                   | 90                                                     | 0.39                                                    |
| 5% La/CeO <sub>2</sub> -750 | 1023                                  | 63                                                     | 0.68                                                    |
| 1% Y/CeO <sub>2</sub>       | 773                                   | 78                                                     | 0.43                                                    |
| 1% Gd/CeO <sub>2</sub>      | 773                                   | 77                                                     | 0.40                                                    |
| 1% Sm/CeO <sub>2</sub>      | 773                                   | 98                                                     | 0.43                                                    |
| 1% Zr/CeO <sub>2</sub>      | 773                                   | 99                                                     | 0.41                                                    |
| 1% Nd/CeO <sub>2</sub>      | 773                                   | 97                                                     | 0.55                                                    |

**Table 5S. Ceria and zirconia mixed oxides prepared by co-precipitation with a second metal oxide**

| Reference<br>(molar composition)                     | Crystallite size<br>nm | Specific surface area<br>$\text{m}^2.\text{g}^{-1}$ | Activity<br>$\mu\text{mol}.\text{g}^{-1}.\text{s}^{-1}$ |
|------------------------------------------------------|------------------------|-----------------------------------------------------|---------------------------------------------------------|
| P-CeO <sub>2</sub>                                   | 6.2                    | 115                                                 | 0.38                                                    |
| Ce <sub>0.88</sub> La <sub>0.12</sub> O <sub>x</sub> | 5.1                    | 134                                                 | 0.56                                                    |
| Ce <sub>0.83</sub> Fe <sub>0.17</sub> O <sub>x</sub> | 4.2                    | 136                                                 | 0.53                                                    |
| Ce <sub>0.98</sub> Al <sub>0.02</sub> O <sub>x</sub> | 5.0                    | 109                                                 | 0.54                                                    |
| Ce <sub>0.95</sub> Al <sub>0.05</sub> O <sub>x</sub> | 4.5                    | 103                                                 | 0.50                                                    |
| Ce <sub>0.99</sub> Gd <sub>0.01</sub> O <sub>x</sub> | 6.1                    | 95                                                  | 0.42                                                    |
| Ce <sub>0.68</sub> Nb <sub>0.32</sub> O <sub>x</sub> | 4.7                    | 132                                                 | 0.02                                                    |
| Ce <sub>0.98</sub> Ti <sub>0.02</sub> O <sub>x</sub> | 5.6                    | 115                                                 | 0.39                                                    |
| Ce <sub>0.90</sub> Ti <sub>0.10</sub> O <sub>x</sub> | 5.7                    | 132                                                 | 0.10                                                    |
| P-ZrO <sub>2</sub>                                   | 6.8                    | 99                                                  | 0.01                                                    |
| Zr <sub>0.98</sub> Ti <sub>0.02</sub> O <sub>x</sub> | 5.7 / 6.3              | 98                                                  | 0.03                                                    |
| Zr <sub>0.91</sub> Ti <sub>0.09</sub> O <sub>x</sub> | 5.1 / 5.7              | 119                                                 | 0.03                                                    |
| Zr <sub>0.99</sub> Al <sub>0.01</sub> O <sub>x</sub> | 7.2                    | 90                                                  | 0.02                                                    |
| Zr <sub>0.97</sub> Al <sub>0.03</sub> O <sub>x</sub> | 6.0                    | 129                                                 | 0.01                                                    |
| TiO <sub>2</sub>                                     | 40                     | 128                                                 | 0.00                                                    |
| Ce <sub>0.77</sub> Zr <sub>0.23</sub> O <sub>2</sub> | 6.1                    | 118                                                 | 0.50                                                    |

Fig. 2S. DRX patterns of CP  $Ce_xZr_{1-x}O_2$

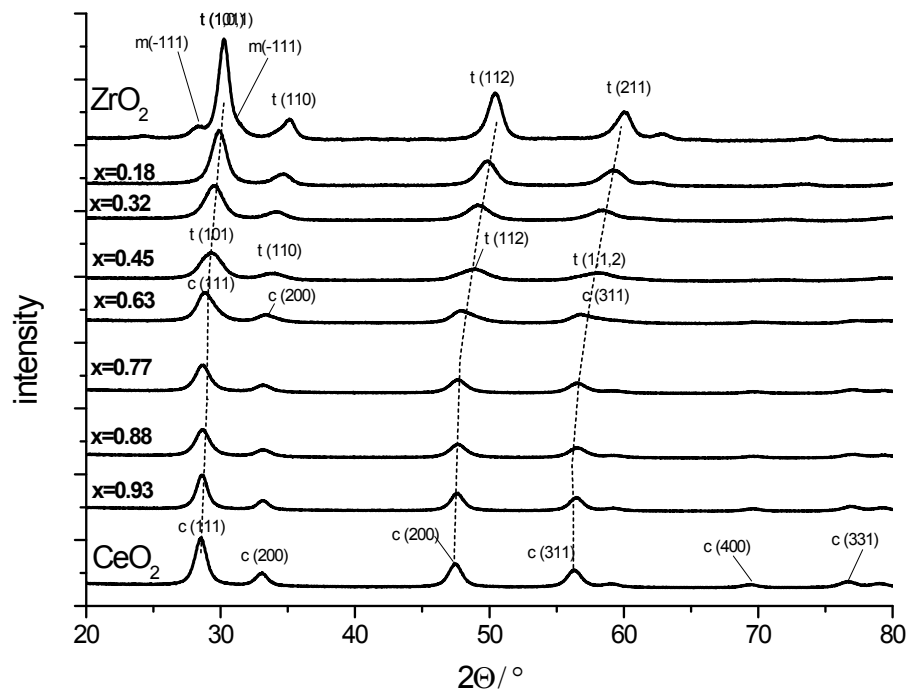

Fig. 3S DRX patterns of FSP  $Ce_xZr_{1-x}O_2$

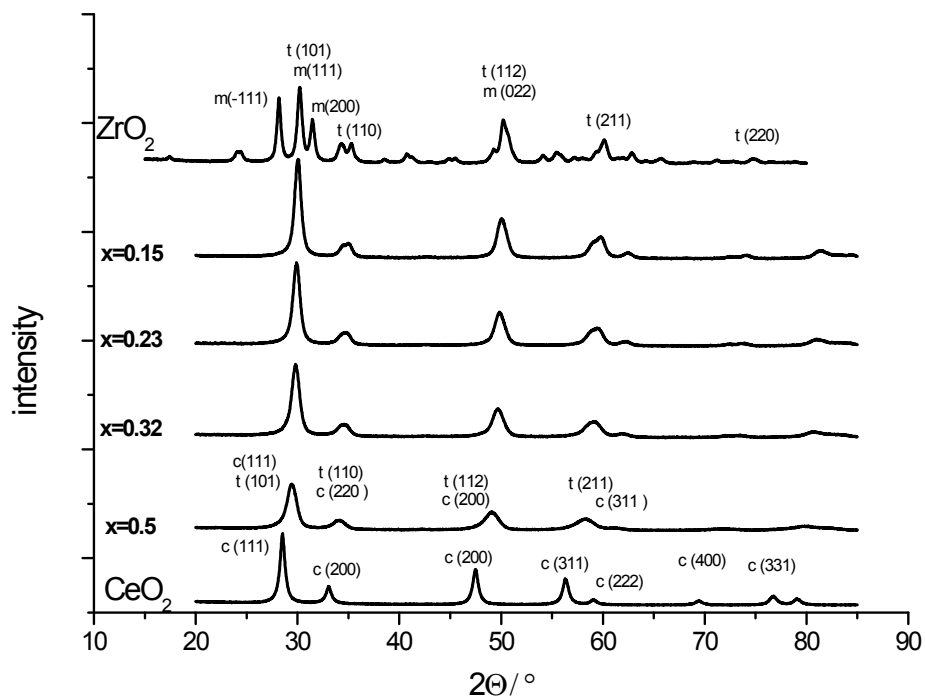

**Table 6S. Ceria-zirconia mixed oxides, co-precipitated**

| Reference<br>(molar composition)             | Crystallite size<br>nm | Specific surface<br>area<br>$\text{m}^2.\text{g}^{-1}$ | Activity<br>$\mu\text{mol}.\text{g}^{-1}.\text{s}^{-1}$ |
|----------------------------------------------|------------------------|--------------------------------------------------------|---------------------------------------------------------|
| $\text{CeO}_2$                               | 8                      | 115                                                    | 0.382                                                   |
| $\text{Ce}_{0.93}\text{Zr}_{0.07}\text{O}_2$ | 6.8                    | 95                                                     | 0.399                                                   |
| $\text{Ce}_{0.88}\text{Zr}_{0.12}\text{O}_2$ | 6.6                    | 105                                                    | 0.417                                                   |
| $\text{Ce}_{0.77}\text{Zr}_{0.23}\text{O}_2$ | 5.8                    | 118                                                    | 0.495                                                   |
| $\text{Ce}_{0.63}\text{Zr}_{0.27}\text{O}_2$ | 3.9                    | 113                                                    | 0.269                                                   |
| $\text{Ce}_{0.45}\text{Zr}_{0.55}\text{O}_2$ | 3.6                    | 119                                                    | 0.244                                                   |
| $\text{Ce}_{0.32}\text{Zr}_{0.68}\text{O}_2$ | 3.9                    | 126                                                    | 0.141                                                   |
| $\text{Ce}_{0.18}\text{Zr}_{0.82}\text{O}_2$ | 5.7                    | 92                                                     | 0.095                                                   |
| $\text{ZrO}_2$                               | 7.2                    | 87                                                     | 0.01                                                    |

**Table 7S. Ceria-zirconia mixed oxides, flame-sprayed**

| Reference<br>(molar composition)             | Crystallite size<br>nm | Specific surface<br>area<br>$\text{m}^2.\text{g}^{-1}$ | Activity<br>$\mu\text{mol}.\text{g}^{-1}.\text{s}^{-1}$ |
|----------------------------------------------|------------------------|--------------------------------------------------------|---------------------------------------------------------|
| $\text{CeO}_2$                               | 11.8                   | 95                                                     | 0.31                                                    |
| $\text{Ce}_{0.5}\text{Zr}_{0.5}\text{O}_2$   | 6.3                    | 99                                                     | 6                                                       |
| $\text{Ce}_{0.32}\text{Zr}_{0.68}\text{O}_2$ | 7                      | 95                                                     | 3.4                                                     |
| $\text{Ce}_{0.23}\text{Zr}_{0.77}\text{O}_2$ | 7.13                   | 88                                                     | 1.75                                                    |
| $\text{Ce}_{0.15}\text{Zr}_{0.85}\text{O}_2$ | 9.4                    | 93                                                     | 0.73                                                    |
| $\text{ZrO}_2$                               | 17                     | 48                                                     | 0.06                                                    |

**Table 8S. Other flame-sprayed ceria-based oxides**

| Reference<br>(% weight) | Specific surface area<br>$\text{m}^2.\text{g}^{-1}$ | Activity<br>$\mu\text{mol}.\text{g}^{-1}.\text{s}^{-1}$ |
|-------------------------|-----------------------------------------------------|---------------------------------------------------------|
| 1% La/ $\text{CeO}_2$   | 99                                                  | 0.63                                                    |
| 1% Nd/ $\text{CeO}_2$   | 105                                                 | 0.58                                                    |
| 1% Zn/ $\text{CeO}_2$   | 96                                                  | 0.49                                                    |

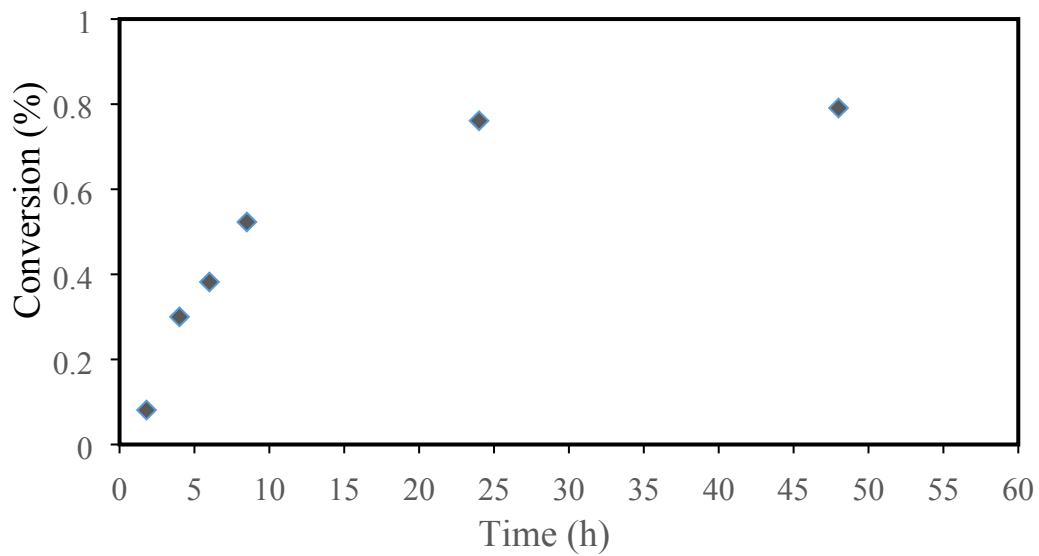

**Fig 4S: Conversion over CP-Ce<sub>0.63</sub>Zr<sub>0.37</sub>O<sub>2</sub> at 413K versus time, molar ratio MeOH/catalyst =577 mol/mol. P=120 bar, T = 413K, MeOH:CO<sub>2</sub>=1:1,Wcat= 0.1 g**
